# Supplementary material
Source: publisher figshare collection journal article supplement (https://frontiersin.figshare.com/ndownloader/files/34385354)
Supplement: Supplementary file [file 34385354]

## Supplementary Material

### 1 Supplementary Figures and figure legend

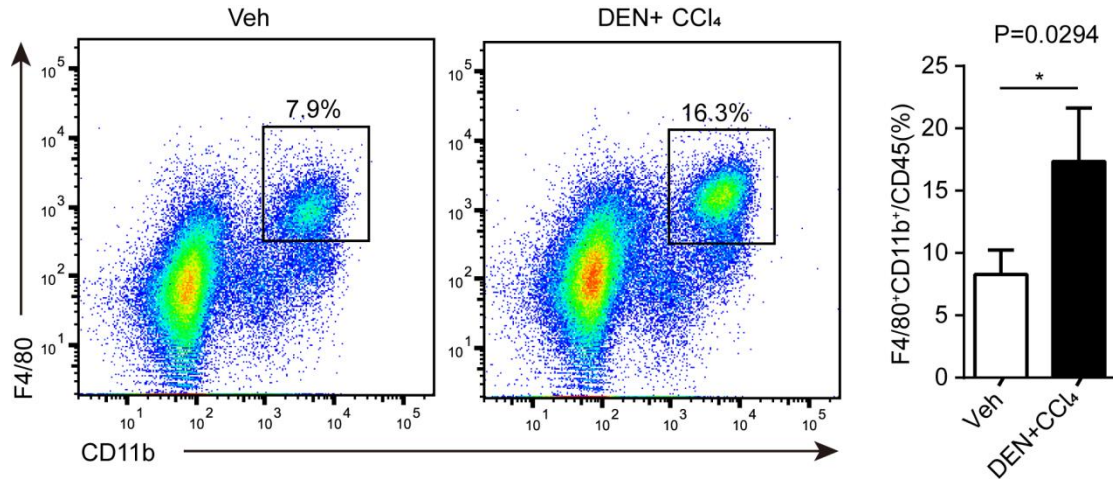

#### Supplementary Figure 1. More macrophages infiltrate into liver tissues in DEN-induced mouse model of HCC

WT male mice were treated with controls (Veh) or DEN (100 mg/kg) to induce HCC and were sacrificed 32 weeks after DEN injection (n = 3). Percentages of intrahepatic MoMs (F4/80<sup>+</sup>CD11b<sup>hi</sup>) were analyzed by FACS (left panel). Data are from three independent experiments mean  $\pm$  SD (right panel). \*P < 0.05, using a two-tailed, unpaired Student's t test.

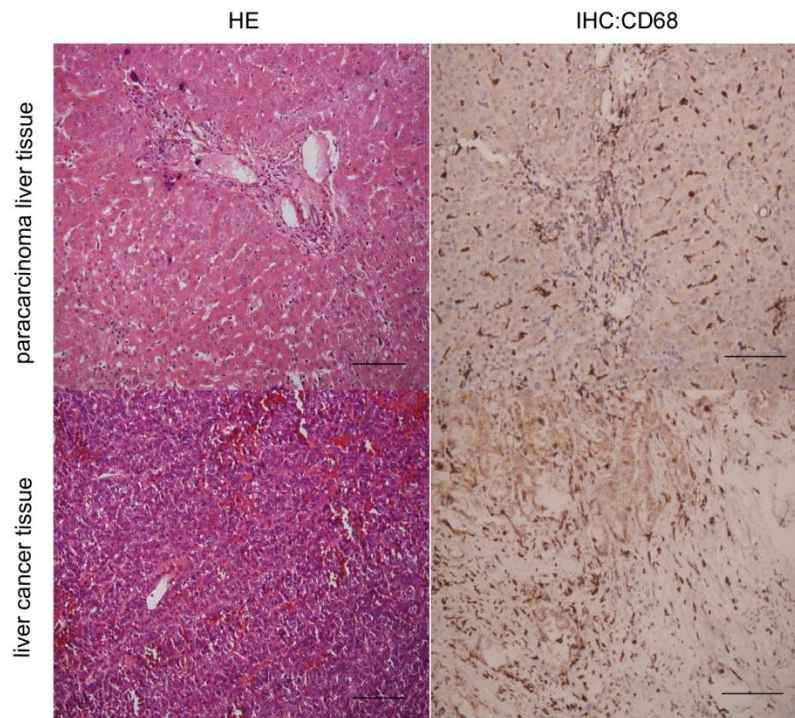

## Supplementary Figure 2. More macrophages infiltrate with liver tissues in human HCC

HE staining (scale bar: 250  $\mu$ m) and IHC staining (scale bar: 250  $\mu$ m) with anti-CD68 of human liver sections from paracarcinoma tissue and tumors of HCC patients.

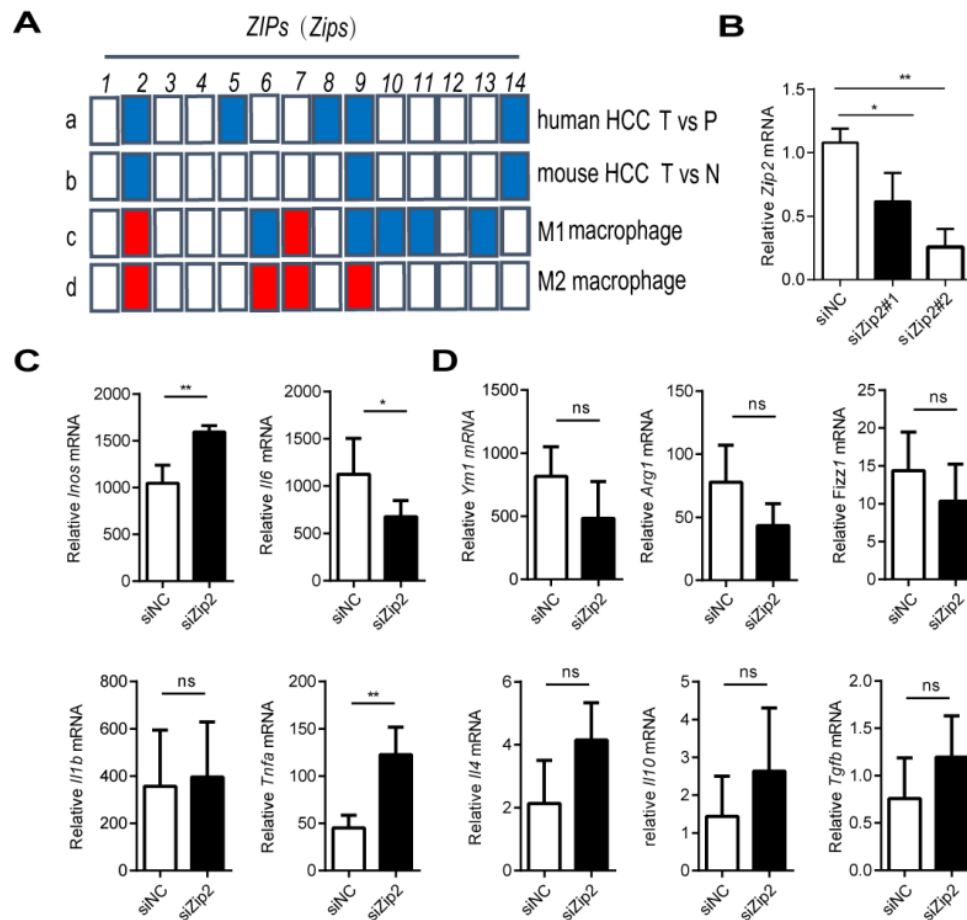

## Supplementary Figure 3. Zip2 knockdown has no effect on M2 macrophages polarity

- (A) Heat-map of transcription changes of *ZIPs/Zips*. a, *ZIPs* changed significantly in human liver cancer tissues and paracarcinoma tissues. b, significantly changed *Zips* in the HCC stage of the mouse model. c, significantly changed *Zips* in M1-polarized macrophages. d, significantly changed *Zips* in M2-polarized macrophages. The red color means up-regulated and blue color represents down-regulated transcription.
- (B) The siRNA knockdown efficiencies of *Zip2*. *Zip2* were analyzed by RT-PCR following transfection with *Zip2* siRNA.
- (C) M1-polarized macrophages characteristic genes (*Inos*, *Il6*, *Il1b*, *Tnfa*) were detected by RT-PCR following transfection with control small interfering RNA (siRNA) and *Zip2* siRNA then stimulated with LPS plus IFN $\gamma$ .
- (D) M2-polarized macrophages characteristic genes (*Ym1*, *Arg1*, *Fizz1*, *Il10*, *Il4*, *Tgf-b*) were detected by RT-PCR following transfection with control small interfering RNA (siRNA) and *Zip2* siRNA then stimulated with IL-4 and IL-13 (20 ng/ml

each). Student's *t* test. Results were presented as the average  $\pm$  SD of three independent experiments. \**P* < 0.05, \*\**P* < 0.01 and ns, not significant.
